# Supplementary material for: Antioxidant activity and mechanism of commercial Rama Forte persimmon fruits (Diospyros kaki)
Source: PeerJ. 2018 Jul 25;6:e5223. doi: 10.7717/peerj.5223 (PMC6064204; doi:10.7717/peerj.5223)
Supplement: Supplemental Information 1 [file peerj-06-5223-s002.xlsx]

## Sheet: Radical scavenging assay
	Persimmon extract (mg/mL)	EPR signal (A.U.)
		Experiment 1	Experiment 2	Experiment 3	Average
	0	1369	1525	1679	1524.33
	1	1217	948	999	1054.67
	2	867	918	1012	932.333
	5	854	968	858	893.333

## Sheet: Extact concentration effect 2DR
	FRUIT #3
	Persimmon extract (mg/mL)	Net Absorbance at 532 nm
		Read A1	Read A2	Read A3	Read B1	Read B2	Read B3	Read C1	Read C2	Read C3	Average
	0	0.126	0.135	0.132	0.128	0.133	0.137	0.153	0.146	0.145	0.137222
	0.2				0.107	0.107	0.107	0.106	0.107	0.103	0.106167
	0.5	0.06975	0.07475	0.06675	0.06475	0.07075	0.06275	0.06875	0.06175	0.06075	0.06675
	1	0.0605	0.0515	0.0525	0.0505	0.0475	0.0605	0.0395	0.0375	0.0455	0.0495
	1.5				0.0265	0.0265	0.0275	0.0225	0.0255	0.0235	0.0253333
	2	0.0146667	0.0386667	0.0356667	0.0106667	0.00366667	0.0136667	0.0146667	0.0166667	0.00666667	0.0172222
	3	0.01075	0.01975	0.01375	0.01675	0	0	0.00775	0.00675	0.00775	0.00925
	5	0.00175	0.01375	0.00975	0	0	0	0.00675	0.00675	0.00375	0.00472222
	FRUIT #17
	Persimmon extract (mg/mL)	Net Absorbance at 532 nm
		Read A1	Read A2	Read A3	Read B1	Read B2	Read B3	Average
	0	0.1725	0.1845	0.1785	0.1905	0.1785	0.1875	0.182
	0.2	0.1565	0.1525	0.1575	0.1705	0.1615	0.1585	0.1595
	0.5	0.138	0.143	0.147	0.1285	0.1345	0.1275	0.136417
	1	0.1235	0.1195	0.1105	0.115	0.108	0.107	0.113917
	1.5	0.1065	0.1045	0.1155	0.0965	0.0995	0.0865	0.1015
	2	0.097	0.098	0.086	0.0795	0.0725	0.0785	0.08525
	3	0.051	0.079	0.079	0.06	0.059	0.063	0.0651667
	5	0.0445	0.0425	0.0445	0.044	0.045		0.0441

## Sheet: Indivudal values for 2-DR assay
	Fruit ID	Assay Absorbance at 532 nm								Positive Control Absorbance at 532 nm						2-DR oxidation (%)
		Read A1	Read A2	Read A3	Read A4	Read B1	Read B2	Read B3		Read A1	Read A2	Read A3	Read B1	Read B2	Read B3
	1	0.043	0.045	0.047		0.025	0.03	0.028		0.1825	0.1725	0.1635	0.163	0.176	0.162	21.383
	2	0.0145	0.0175	0.0135		0.028	0.01	0.02		0.1825	0.1725	0.1635	0.163	0.176	0.162	10.152
	3	0.006	0.03	0.027		0.019	0.021	0.011		0.133	0.138	0.142	0.1545	0.1475	0.1465	13.2327
	4	0.0355	0.0365	0.0295		0.0205	0.0165	0.0155		0.1825	0.1725	0.1635	0.163	0.176	0.162	15.1054
	5	0.0323333	0.0253333	0.0263333		0.023	0.017	0.004		0.1865	0.1785		0.152	0.165	0.164	12.6084
	6	0.0136667	0.0146667	0.00966667	0.0146667	0.017	0.012	0.02		0.1865	0.1785		0.152	0.165	0.164	8.58381
	7	0.0245	0.0355	0.0345		0.025	0.028	0.028		0.1765	0.1805		0.1775	0.1775	0.1785	16.4234
	8	0.0415	0.0275	0.0345		0.035	0.036	0.033		0.1765	0.1805		0.1775	0.1775	0.1785	19.4179
	9	0.04	0.045	0.039	0.045	0.054	0.051	0.049		0.1865	0.1785		0.152	0.165	0.164	27.2712
	10	0.024	0.028	0.028		0.022	0.024	0.022		0.195	0.183	0.189	0.159	0.155	0.155	14.2857
	11	0.0393333	0.0463333	0.0453333	0.0393333	0.0245	0.0275	0.0275		0.1865	0.1785		0.152	0.165	0.164	21.0937
	12	0.035	0.024	0.04	0.024	0.017	0.015	0.023		0.1865	0.1785		0.152	0.165	0.164	15.0287
	13	0.023	0.01	0.018		0.0255	0.0395	0.0335		0.1765	0.1805		0.1775	0.1775	0.1785	13.9903
	14	0.013	0.016	0.01		0.0195	0.0265	0.0175		0.1765	0.1805		0.1775	0.1775	0.1785	9.59199
	15	0.019	0.031	0.016		0.029	0.024	0.034		0.1765	0.1805		0.1775	0.1775	0.1785	14.3178
	16	0.0315	0.0315	0.0245		0.0225	0.0225	0.0275		0.1825	0.1725	0.1635	0.163	0.176	0.162	15.694
	17	0.097	0.098	0.086		0.0795	0.0725	0.0835		0.1725	0.1845	0.1645	0.1905	0.1785	0.1875	47.9128
	18	0.0715	0.0705	0.0895		0.055	0.065	0.068		0.1825	0.1725	0.1635	0.163	0.176	0.162	41.1476
	19	0.077	0.072	0.089		0.072	0.06	0.059		0.195	0.183	0.189	0.159	0.155	0.155	41.4093
	20	0.0795	0.0885	0.0865		0.0645	0.0645	0.0605		0.195	0.183	0.189	0.159	0.155	0.155	42.8571

## Sheet: Chelant affinity effect
	Figure3A
	FeIII-Citrate (uM)	Absorbance at 532 nm (AVG)
		Assay (+Extract)	Positive Control
	0	0	0
	10	0.0081	0.0454167
	25	0.0128333	0.103
	50	0.02175	0.1855
	100	0.06525	0.247583
	Figure3B
	FeIII-EDTA (uM)	Absorbance at 532 nm (AVG)
		Assay (+Extract)	Positive Control
	0	0	0
	10	0.1054	0.48225
	25	0.2216	0.722833
	50	0.31725	0.829583
	100	0.365	0.833
	Figure 3C				Figure 3D
	EDTA (uM)	Absorbance at 532 nm (AVG)			Relative Protection (%)
		Assay (+Extract)	Positive Control
	0	0.0323333	0.1685		80.8111
	50	0.345	0.798167		56.7759
	100	0.350333	0.788333		55.5603
	250	0.3492	0.7735		54.8546
	500	0.320667	0.75		57.2444

## Sheet: Pre-incubation and DR 
	Figure 4A
	Pre-incubation (min)	Assay Absorbance at 532 nm (+Extract)
		Read1	Read2	Read3	Read4	Read5	Read6	Read7	Read8	Read9	AVG
	0	0.256	0.313	0.311	0.348	0.317	0.332	0.347	0.316	0.331	0.319
	10	0.348	0.348	0.333	0.345	0.32	0.279	0.344	0.319	0.278	0.323778
	30	0.314	0.342	0.316	0.364	0.355	0.333	0.363	0.354	0.332	0.341444
	60	0.32	0.327	0.323	0.336	0.296	0.346	0.335	0.295	0.345	0.324778
	Pre-incubation (min)	Positive Control Absorbance at 532 nm
		Read1	Read2	Read3	Read4	Read5	Read6	AVG
	0	0.768	0.776	0.712	0.693	0.725	0.682	0.726
	10	0.746	0.757	0.782	0.694	0.692	0.727	0.733
	30	0.724	0.746	0.73	0.74	0.716	0.717	0.728833
	60	0.711	0.739	0.747	0.735	0.74	0.734	0.734333
	Figure 4B
	2-DR conc. (mM)	Assay Absorbance at 532 nm (+Extract)
		Read1	Read2	Read3	Read4	Read5	Read6	Read7	Read8	Read9	Read10	Read11	Read12	AVG
	0	0.01	0.01	0.01	0.014	0.012	0.011	0.003	0.005	0.007	0.01	0.008		0.00909091
	5	0.346	0.325	0.315	0.298	0.307	0.324	0.284	0.267	0.252	0.314	0.31	0.307	0.304083
	10	0.408	0.416	0.455	0.386	0.408	0.411	0.361	0.382	0.377	0.457	0.435	0.41	0.408833
	20	0.521	0.519	0.514	0.5	0.559	0.494		0.469	0.451		0.529	0.551	0.5107
	2-DR conc. (mM)	Positive Control Absorbance at 532 nm
		Read1	Read2	Read3	Read4	Read5	Read6	AVG
	0	0.006	0.009	0.006	0.008	0.005	0.006	0.00666667
	5	0.761	0.745	0.728	0.683	0.675	0.688	0.713333
	10	0.803	0.785	0.812	0.811	0.728	0.808	0.791167
	20	0.827	0.779	0.784	0.75	0.741	0.81	0.781833

## Sheet: Lipid peroxidation
	Reaction time (min)	Positive Control Net Absorbance
		532-600	532-600	532-600	532-600	532-600	532-600	AVG
	0	0.042	0.04	0.047	0.044	0.03	0.025	0.038
	1	0.039	0.042			0.031	0.031	0.03575
	5	0.054	0.059			0.074	0.068	0.06375
	10	0.181	0.182	0.316	0.319	0.259	0.263	0.253333
	20	0.386	0.413	0.405	0.406	0.432	0.437	0.413167
	30	0.459	0.467	0.459	0.465	0.479	0.493	0.470333
	40	0.522	0.521	0.546	0.517	0.515	0.506	0.521167
	50	0.558	0.595	0.661	0.666	0.512	0.54	0.588667
	60	0.605	0.616	0.599	0.623	0.547	0.597	0.597833
	90	0.651	0.625	0.662	0.657	0.573	0.62	0.631333
	120	0.816	0.819	0.831	0.819	0.677	0.668	0.771667
	150	0.821	0.826	0.854	0.833	0.643	0.668	0.774167
	Reaction time (min)	Negative Control Net Absorbance (+BHT)
		532-600	532-600	532-600	532-600	532-600	532-600	AVG
	0	0.063	0.066	0.048	0.049	0.025	0.025	0.046
	30	0.062	0.053	0.051	0.057			0.05575
	60	0.052	0.054	0.034	0.029	0.026	0.022	0.0361667
	90	0.053	0.053	0.029	0.03			0.04125
	120	0.068	0.063	0.021	0.018			0.0425
	150	0.068	0.059	0.017	0.012	0.025	0.017	0.033
	Reaction time (min)	Assay Net Absorbance (+Extract)
		532-600	532-600	532-600	532-600	532-600	532-600	532-601	532-602	AVG
	0	0.011	0.014	0.011	0.008	0.013	0.013	0.004	0.003	0.009625
	1			0.005	0.004	0.011	0.009	0.01	0.005	0.00733333
	5			0.012	0.007	0.011	0.012	0.006	0.003	0.0085
	10	0.067	0.058	0.028	0.025	0.048	0.058	0.015	0.015	0.03925
	20	0.16	0.177	0.103	0.091	0.167	0.22	0.081	0.081	0.135
	30	0.224	0.313	0.226	0.221	0.317	0.312	0.141	0.145	0.237375
	40	0.255	0.235	0.304	0.297	0.366	0.334	0.206	0.172	0.271125
	50	0.312	0.26	0.305	0.263	0.355	0.346	0.24	0.219	0.2875
	60	0.321	0.308	0.306	0.354	0.386	0.333	0.249	0.242	0.312375
	90	0.32	0.32	0.357	0.357	0.439	0.442	0.341	0.334	0.36375
	120	0.32	0.361	0.384	0.406	0.567	0.579	0.395	0.378	0.42375
	150	0.408	0.373	0.515	0.422	0.593	0.62	0.42	0.427	0.47225

## Sheet: Lipid peroxidation 2
	Sample	Assay		Experiment 1									Experiment 2									Absorbance 532-600 nm (Corrected for Blank)						LPO relative to positive control (%)			Sample	LPO relative to positive control (%)
				Read 1			Read 2			Read 3			Read 1			Read 2			Read 3
				532	600	532-600	532	600	532-600	532	600	532-600	532	600	532-600	532	600	532-600	532	600	532-600	Read 1	Read 2	Read 3	Read 1	Read 2	Read 3	Average	STDEV			Average	STDEV
	7	Positive Control		0.664	0.101	0.563	0.672	0.11	0.562	0.669	0.11	0.559	0.709	0.119	0.59	0.708	0.113	0.595	0.694	0.107	0.587	0.536	0.535	0.532	0.558	0.563	0.555	35.6206	3.84989		1	63.7232	6.02523
		Assay (+extract)		0.205	0.012	0.193	0.232	0.012	0.22	0.206	0.014	0.192	0.245	0.042	0.203	0.28	0.036	0.244	0.264	0.043	0.221	0.174	0.201	0.173	0.187	0.228	0.205				2	11.3156	5.24843
		Blank for Positive Control		0.104	0.077	0.027							0.138	0.106	0.032																3	65.6187	6.05639
		Blank for Assay (+extract)		0.044	0.025	0.019							0.039	0.023	0.016																4	50.8301	8.40616
	10	Positive Control		0.664	0.101	0.563	0.672	0.11	0.562	0.669	0.11	0.559	0.709	0.119	0.59	0.708	0.113	0.595	0.694	0.107	0.587	0.536	0.535	0.532	0.558	0.563	0.555	13.5712	1.9654		5	31.6915	5.93431
		Assay (+extract)		0.204	0.128	0.076	0.12	0.015	0.105	0.098	0.013	0.085	0.123	0.035	0.088	0.115	0.033	0.082	0.13	0.034	0.096	0.064	0.093	0.073	0.071	0.065	0.079				6	45.8851	3.16534
		Blank for Positive Control		0.104	0.077	0.027							0.138	0.106	0.032																7	35.6206	3.84989
		Blank for Assay (+extract)		0.028	0.016	0.012							0.034	0.017	0.017																8	7.67045	5.01483
	4	Positive Control		0.562	0.081	0.481	0.586	0.084	0.502	0.573	0.083	0.49	0.733	0.109	0.624	0.701	0.103	0.598	0.737	0.111	0.626	0.458	0.479	0.467	0.584	0.558	0.586	50.8301	8.40616		9	28.7879	5.52303
		Assay (+extract)		0.337	0.044	0.293	0.364	0.047	0.317	0.37	0.049	0.321	0.343	0.054	0.289	0.283	0.038	0.245	0.264	0.047	0.217	0.281	0.305	0.309	0.271	0.227	0.199				10	13.5712	1.9654
		Blank for Positive Control		0.068	0.045	0.023							0.105	0.065	0.04																11	44.8789	10.2708
		Blank for Assay (+extract)		0.033	0.021	0.012							0.039	0.021	0.018																12	31.8795	4.81703
	2	Controle positivo		0.678	0.151	0.527	0.663	0.14	0.523	0.677	0.163	0.514	0.824	0.165	0.659	0.681	0.136	0.545	0.615	0.105	0.51	0.501	0.497	0.488	0.621	0.507	0.472	11.3156	5.24843		13	7.91075	4.18825
		caqui 2		0.069	0.028	0.041	0.091	0.03	0.061	0.076	0.029	0.047	0.109	0.01	0.099	0.135	0.02	0.115				0.031	0.051	0.037	0.078	0.094					14	11.8661	2.59365
		Branco Cont +		0.079	0.053	0.026							0.113	0.075	0.038																15	24.1793	16.2003
		Branco caqui 2		0.046	0.036	0.01							0.032	0.011	0.021																16	17.2424	3.48751
	5	Controle positivo		0.678	0.151	0.527	0.663	0.14	0.523	0.677	0.163	0.514	0.824	0.165	0.659	0.681	0.136	0.545	0.615	0.105	0.51	0.501	0.497	0.488	0.621	0.507	0.472	31.6915	5.93431		17	60.1091	8.00114
		caqui 5		0.241	0.039	0.202	0.242	0.043	0.199	0.246	0.039	0.207	0.181	0.021	0.16	0.181	0.018	0.163	0.174	0.019	0.155	0.19	0.187	0.195	0.136	0.139	0.131				18	53.2255	2.91572
		Branco Cont +		0.079	0.053	0.026							0.113	0.075	0.038																19	57.9314	6.53283
		Branco caqui 5		0.062	0.05	0.012							0.039	0.015	0.024																20	61.8371	4.79245
	11	Controle positivo		0.678	0.151	0.527	0.663	0.14	0.523	0.677	0.163	0.514	0.562	0.081	0.481	0.586	0.084	0.502	0.573	0.083	0.49	0.501	0.497	0.488	0.458	0.479	0.467	44.8789	10.2708
		caqui 11		0.293	0.038	0.255	0.31	0.043	0.267	0.352	0.047	0.305	0.225	0.034	0.191	0.201	0.035	0.166	0.234	0.037	0.197	0.237	0.249	0.287	0.181	0.156	0.187
		Branco Cont +		0.079	0.053	0.026							0.068	0.045	0.023
		Branco caqui 11		0.042	0.024	0.018							0.031	0.021	0.01
	6	Controle positivo		0.704	0.096	0.608	0.69	0.087	0.603	0.703	0.095	0.608	0.731	0.123	0.608	0.743	0.124	0.619	0.731	0.125	0.606	0.576	0.571	0.576	0.577	0.588	0.575	45.8851	3.16534
		caqui 6		0.305	0.029	0.276	0.32	0.029	0.291	0.341	0.033	0.308	0.311	0.038	0.273	0.33	0.051	0.279	0.311	0.05	0.261	0.262	0.277	0.294	0.254	0.26	0.242
		Branco Cont +		0.095	0.063	0.032							0.094	0.063	0.031
		Branco caqui 6		0.037	0.023	0.014							0.045	0.026	0.019
	13	Controle positivo		0.733	0.109	0.624	0.701	0.103	0.598	0.737	0.111	0.626	0.704	0.096	0.608	0.69	0.087	0.603	0.703	0.095	0.608	0.584	0.558	0.586	0.576	0.571	0.576	7.91075	4.18825
		caqui 13		0.062	0.027	0.035	0.057	0.028	0.029	0.074	0.026	0.048	0.089	0.024	0.065	0.111	0.023	0.088	0.103	0.023	0.08	0.023	0.017	0.036	0.053	0.076	0.068
		Branco Cont +		0.105	0.065	0.04							0.095	0.063	0.032
		Branco caqui 13		0.03	0.018	0.012							0.032	0.02	0.012
	18	Controle positivo		0.704	0.096	0.608	0.69	0.087	0.603	0.703	0.095	0.608	0.731	0.123	0.608	0.743	0.124	0.619	0.731	0.125	0.606	0.576	0.571	0.576	0.577	0.588	0.575	53.2255	2.91572
		caqui 18		0.353	0.027	0.326	0.361	0.032	0.329	0.376	0.032	0.344	0.353	0.046	0.307	0.341	0.046	0.295				0.311	0.314	0.329	0.297	0.285
		Branco Cont +		0.095	0.063	0.032							0.094	0.063	0.031
		Branco caqui 18		0.036	0.021	0.015							0.04	0.03	0.01
	14	Controle positivo		0.609	0.05	0.559	0.551	0.048	0.503				0.569	0.057	0.512	0.565	0.053	0.512				0.538	0.482		0.476	0.476		11.8661	2.59365
		caqui 14		0.12	0.026	0.094	0.108	0.026	0.082	0.112	0.026	0.086	0.102	0.019	0.083	0.071	0.006	0.065	0.078	0.005	0.073	0.075	0.063	0.067	0.058	0.04	0.048
		Branco Cont +		0.135	0.114	0.021							0.094	0.058	0.036
		Branco caqui 14		0.036	0.017	0.019							0.03	0.005	0.025
	3	Controle positivo		0.609	0.05	0.559	0.551	0.048	0.503				0.569	0.057	0.512	0.565	0.053	0.512				0.538	0.482		0.476	0.476		65.6187	6.05639
		caqui 3		0.417	0.075	0.342	0.407	0.039	0.368	0.422	0.047	0.375	0.348	0.011	0.337	0.343	0.015	0.328	0.331	0.02	0.311	0.328	0.354	0.361	0.311	0.302	0.285
		Branco Cont +		0.135	0.114	0.021							0.094	0.058	0.036
		Branco caqui 3		0.037	0.023	0.014							0.032	0.006	0.026
	16	Controle positivo		0.731	0.123	0.608	0.743	0.124	0.619	0.731	0.125	0.606	0.569	0.057	0.512	0.565	0.053	0.512				0.577	0.588	0.575	0.476	0.476		17.2424	3.48751
		caqui 16		0.153	0.032	0.121	0.145	0.032	0.113	0.147	0.035	0.112	0.122	0	0.122	0.123	0.006	0.117	0.085	0.005	0.08	0.109	0.101	0.1	0.098	0.093	0.056
		Branco Cont +		0.094	0.063	0.031							0.094	0.058	0.036
		Branco caqui 16		0.037	0.025	0.012							0.028	0.004	0.024
	1	Controle positivo		0.678	0.151	0.527	0.663	0.14	0.523	0.677	0.163	0.514	0.611	0.046	0.565	0.559	0.064	0.495	0.547	0.043	0.504	0.501	0.497	0.488	0.526	0.456	0.465	63.7232	6.02523
		caqui 1		0.412	0.045	0.367	0.404	0.047	0.357	0.4	0.046	0.354	0.352	0.032	0.32	0.32	0.017	0.303	0.351	0.015	0.336	0.344	0.334	0.331	0.287	0.27	0.303
		Branco Cont +		0.079	0.053	0.026							0.073	0.034	0.039
		Branco caqui 1		0.084	0.061	0.023							0.057	0.024	0.033
	12	Controle positivo		0.731	0.123	0.608	0.743	0.124	0.619	0.731	0.125	0.606	0.611	0.046	0.565	0.559	0.064	0.495	0.547	0.043	0.504	0.577	0.588	0.575	0.526	0.456	0.465	31.8795	4.81703
		caqui 12		0.245	0.037	0.208	0.257	0.046	0.211	0.235	0.041	0.194	0.211	0.018	0.193	0.186	0.011	0.175	0.186	0.01	0.176	0.195	0.198	0.181	0.159	0.141	0.142
		Branco Cont +		0.094	0.063	0.031							0.073	0.034	0.039
		Branco caqui 12		0.042	0.029	0.013							0.057	0.023	0.034
	17	Controle positivo		0.678	0.151	0.527	0.663	0.14	0.523	0.677	0.163	0.514	0.611	0.046	0.565	0.559	0.064	0.495	0.547	0.043	0.504	0.501	0.497	0.488	0.526	0.456	0.465	60.1091	8.00114
		caqui 17		0.319	0.044	0.275	0.318	0.044	0.274	0.322	0.043	0.279	0.383	0.027	0.356	0.378	0.02	0.358	0.424	0.044	0.38	0.258	0.257	0.262	0.32	0.322	0.344
		Branco Cont +		0.079	0.053	0.026							0.073	0.034	0.039
		Branco caqui 17		0.037	0.02	0.017							0.048	0.012	0.036
	19	Controle positivo		0.609	0.05	0.559	0.551	0.048	0.503				0.611	0.046	0.565	0.559	0.064	0.495	0.547	0.043	0.504	0.538	0.482		0.526	0.456	0.465	57.9314	6.53283
		caqui 19		0.492	0.15	0.342	0.478	0.151	0.327	0.473	0.139	0.334	0.309	0.01	0.299	0.29	0.007	0.283	0.291	0.011	0.28	0.322	0.307	0.314	0.269	0.253	0.25
		Branco Cont +		0.135	0.114	0.021							0.073	0.034	0.039
		Branco caqui 19		0.078	0.058	0.02							0.03	0	0.03
	8	Controle positivo		0.657	0.115	0.542	0.63	0.052	0.578	0.619	0.059	0.56	0.686	0.113	0.573	0.668	0.089	0.579				0.508	0.544	0.526	0.528	0.534		7.67045	5.01483
		caqui 8		0.108	0.018	0.09	0.097	0.014	0.083	0.1	0.023	0.077	0.066	0.022	0.044	0.061	0.022	0.039	0.061	0.019	0.042	0.071	0.064	0.058	0.019	0.014	0.017
		Branco Cont +		0.095	0.061	0.034							0.194	0.149	0.045
		Branco caqui 8		0.032	0.013	0.019							0.053	0.028	0.025
	9	Controle positivo		0.657	0.115	0.542	0.63	0.052	0.578	0.619	0.059	0.56	0.686	0.113	0.573	0.668	0.089	0.579				0.508	0.544	0.526	0.528	0.534		28.7879	5.52303
		caqui 9		0.219	0.029	0.19	0.194	0.011	0.183	0.214	0.012	0.202	0.211	0.023	0.188	0.167	0.026	0.141	0.165	0.025	0.14	0.171	0.164	0.183	0.163	0.116	0.115
		Branco Cont +		0.095	0.061	0.034		0.508	0.544	0.526			0.194	0.149	0.045
		Branco caqui 9		0.03	0.011	0.019		0.171	0.164	0.183			0.042	0.017	0.025
	15	Controle positivo		0.657	0.115	0.542	0.63	0.052	0.578	0.619	0.059	0.56	0.686	0.113	0.573	0.668	0.089	0.579				0.508	0.544	0.526	0.528	0.534		24.1793	16.2003
		caqui 15		0.243	0.01	0.233	0.24	0.016	0.224	0.25	0.015	0.235	0.095	0.022	0.073	0.088	0.015	0.073	0.09	0.021	0.069	0.208	0.199	0.21	0.051	0.051	0.047
		Branco Cont +		0.095	0.061	0.034							0.194	0.149	0.045
		Branco caqui 15		0.035	0.01	0.025							0.042	0.02	0.022
	20	Controle positivo		0.657	0.115	0.542	0.63	0.052	0.578	0.619	0.059	0.56	0.686	0.113	0.573	0.668	0.089	0.579				0.508	0.544	0.526	0.528	0.534		61.8371	4.79245
		caqui 20		0.341	0.012	0.329	0.321	0.011	0.31	0.356	0.014	0.342	0.412	0.029	0.383	0.404	0.03	0.374	0.397	0.032	0.365	0.308	0.289	0.321	0.356	0.347	0.338
		Branco Cont +		0.095	0.061	0.034							0.194	0.149	0.045
		Branco caqui 20		0.031	0.01	0.021							0.063	0.036	0.027

## Sheet: Sugar content
	Fruit ID	Sugar content (mg/mg of fruit)
		Read A1	Read A2	Read A3	Read B1	Read B2	Read B3	AVERAGE
	1	0.20385	0.248154	0.299842	0.458867	0.487535	0.480081	0.363055
	2	0.187112	0.20828	0.307719	0.477788	0.477788	0.477788	0.356079
	3	0.334794	0.376637	0.390913	0.521364	0.492122	0.491549	0.434563
	4	0.349562	0.326425	0.387959	0.470907	0.45944	0.473774	0.411345
	5	0.368268	0.343162	0.36876	0.503589	0.500149	0.504736	0.431444
	6	0.386975	0.284582	0.279167	0.589021	0.748418	0.560353	0.474753
	7	0.275229	0.387467	0.372206	0.660119	0.56322	0.52079	0.463172
	8	0.456877	0.325441	0.296889	0.555192	0.664132	0.603929	0.483743
	9	0.391897	0.406665	0.364822	0.808621	0.636611	0.815502	0.570686
	10	0.417988	0.324456	0.373191	0.771926	0.693948	0.876279	0.576298
	11	0.334301	0.304273	0	0.593035	0.531111	0.610809	0.395588
	12	0.237324	0.364822	0.269814	0.564366	0.608516	0.764472	0.468219
	13	0.318057	0.318549	0.451462	0.51735	0.690507	0.548312	0.474039
	14	0.406665	0.386975	0.482475	0.578127	0.738097	0.613676	0.534336
	15	0.409127	0.435709	0.431771	0.78798	0.479508	0.45772	0.500302
	16	0.436202	0.424879	0	0.453133	0.761032	0.686494	0.46029
	17	0.460815	0.455892	0.418972	0.758738	0.767339	0.708282	0.595006
	18	0.336763	0.480014	0.534656	0.451986	0.695668	0.715162	0.535708
	19	0.413557	0.470168	0.541548	0.67732	0.732363	0.723189	0.593024
	20	0.372699	0.408142	0.3599	0.562073	0.714015	0.727203	0.524005

## Sheet: Table S1 data
	Without Fe3+
	Persimmon extract (mg/mL)	EPR signal (A.U.)
		Read 1	Read 2	Read 3	Read 4	Average
	0	858	856	928		880.667
	0.5	1006	773	572	1378	932.25
	1	1269	1213	1018		1166.67
	2	1795	1475	1165		1478.33
	5	3092	2177	2461		2576.67
	Experimental
	Persimmon extract (mg/mL)	EPR signal (A.U.)
		Read 1	Read 2	Read 3	Read 4	Average
	0	1622	1867	1729		1739.33
	0.5	1541	1984	1502		1675.67
	1	1989	1806	1732		1842.33
	2	2284	2076	2214	1919	2123.25
	5	2649	2494	2441		2528
