# Supplementary material for: Antioxidant activity and mechanism of commercial Rama Forte persimmon fruits (Diospyros kaki)
Source: PeerJ. 2018 Jul 25;6:e5223. doi: 10.7717/peerj.5223 (PMC6064204; doi:10.7717/peerj.5223)
Supplement: Table S1 [file peerj-06-5223-s001.xlsx]

## Sheet: Sheet1
	Table S1. Ascorbyl radical intensity in different persimmon extract concentrations measured by EPR as in Dalvi et al. (2017).
	Persimmon extract (mg/mL)	Control without Fe(III)					Experimental (+ Fe(III))
		Signal intensity (AU)			N		Signal intensity (AU)			N
	0	880.667	±	41.0041	3		1739.33	±	122.826	3
	0.5	932.25	±	346.06	4		1675.67	±	267.736	4
	1	1166.67	±	131.759	3		1842.33	±	132.296	3
	2	1478.33	±	315.013	3		2123.25	±	161.273	3
	5	2576.67	±	468.338	3		2528	±	108.088	3
